# Supplementary material for: Regulation of Phosphorus Supply on Nodulation and Nitrogen Fixation in Soybean Plants with Dual-Root Systems
Source: MDPI journal article supplement (doi:10.3390/agronomy11112354), 2021-11-20
Supplement: s1 [file s1]

Archive with 1 entries (1 files):
- agronomy-1433489-supplementary.pdf
